# Supplementary material for: Highly effective Brønsted base/lewis acid cooperative catalysis: a new Cd metal–organic framework for the synthesis of Hantzsch 1,4-DHPs at ambient temperature
Source: Royal Society of Chemistry journal article supplement (doi:10.1039/c7nj01509g), 2017-01-01

**Supporting Information**

**Highly Effective Brønsted Base/Lewis Acid Cooperative Catalysis: A new Cd  
metal-organic framework for synthesis of Hantzsch 1, 4-DHPs at ambient  
temperature**

**Farzaneh Rouhani and Ali Morsali\***

Department of Chemistry, Faculty of Sciences, Tarbiat Modares University, P.O. Box 14115-  
175, Tehran, Iran

\*To whom correspondence should be addressed, E-mail: [morsali\\_a@modares.ac.ir](mailto:morsali_a@modares.ac.ir)

## Supporting Information

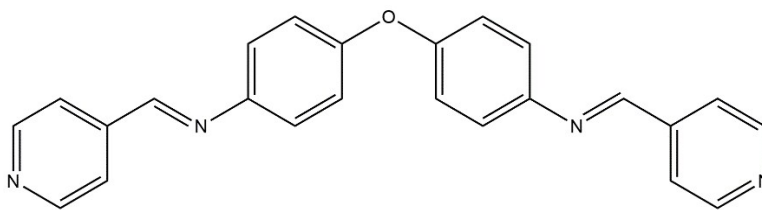

**Scheme. S.1.** N,N'-(oxybis(4,1-phenylene))bis(1-(pyridin-4-yl)methanimine), OPP ligand.

**Table S.1.** Crystal data and structure refinements for compound TMU-33.

| Identification code                      | TMU-33                                                                                                             |
|------------------------------------------|--------------------------------------------------------------------------------------------------------------------|
| Chemical formula                         | C <sub>54</sub> H <sub>44</sub> Cd <sub>3</sub> N <sub>6</sub> O <sub>15</sub> ,2(C <sub>2</sub> H <sub>7</sub> N) |
| Formula weight                           | 1444.32                                                                                                            |
| T(K)                                     | 298                                                                                                                |
| Crystal syst                             | Monoclinic                                                                                                         |
| Space group                              | C <sub>2</sub> /c                                                                                                  |
| a (Å)                                    | 32.476(8)                                                                                                          |
| b (Å)                                    | 11.761(2)                                                                                                          |
| c (Å)                                    | 16.740(3)                                                                                                          |
| β (deg)                                  | 112.62(3)                                                                                                          |
| V (Å <sup>3</sup> )                      | 5902(2)                                                                                                            |
| Z                                        | 4                                                                                                                  |
| F(000)                                   | 2904                                                                                                               |
| Θ range (°)                              | 2.43-25.00                                                                                                         |
| Goodness-of-fit on <i>F</i> <sup>2</sup> | 0.894                                                                                                              |
| R <sub>1</sub> <sup>a</sup> [I>2σ(I)]    | 0.1660                                                                                                             |
| wR <sub>2</sub> <sup>b</sup>             | 0.1591                                                                                                             |
| CCDC number                              | 1522499                                                                                                            |

## Supporting Information

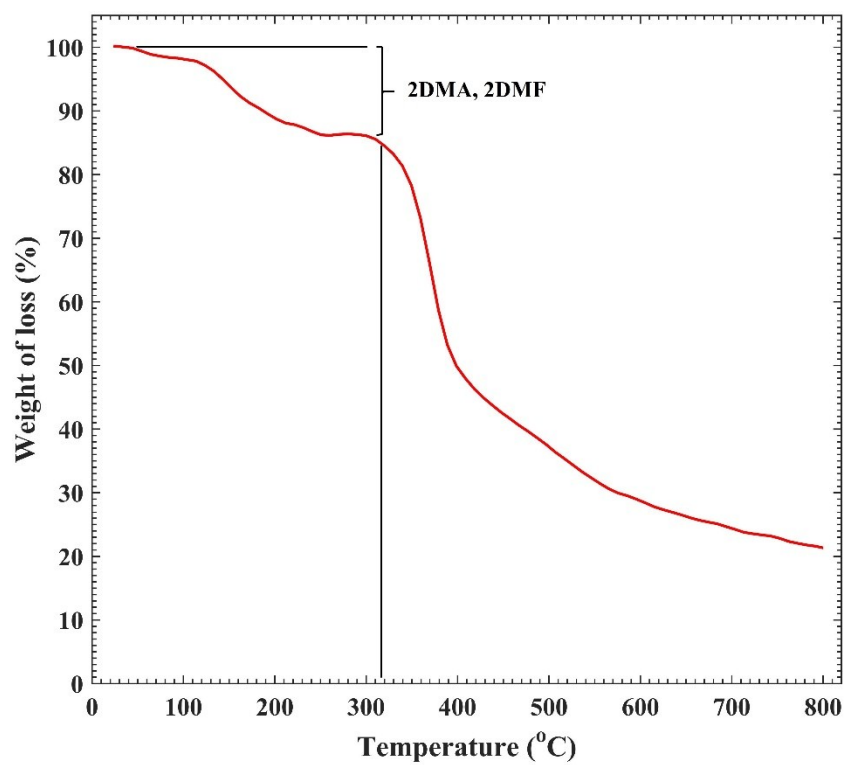

Fig. S.1. TGA curves of TMU-33.

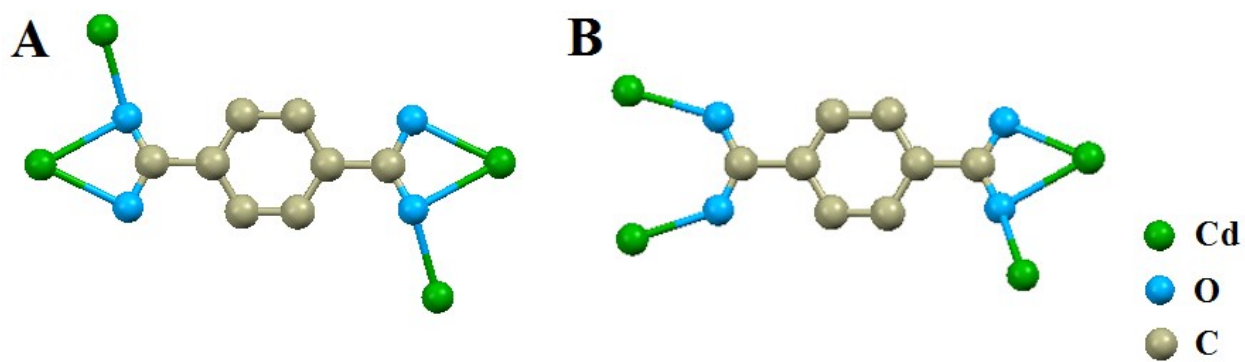

Scheme S.2. Two different coordination mode of terephthalic acid at TMU-33.

## Supporting Information

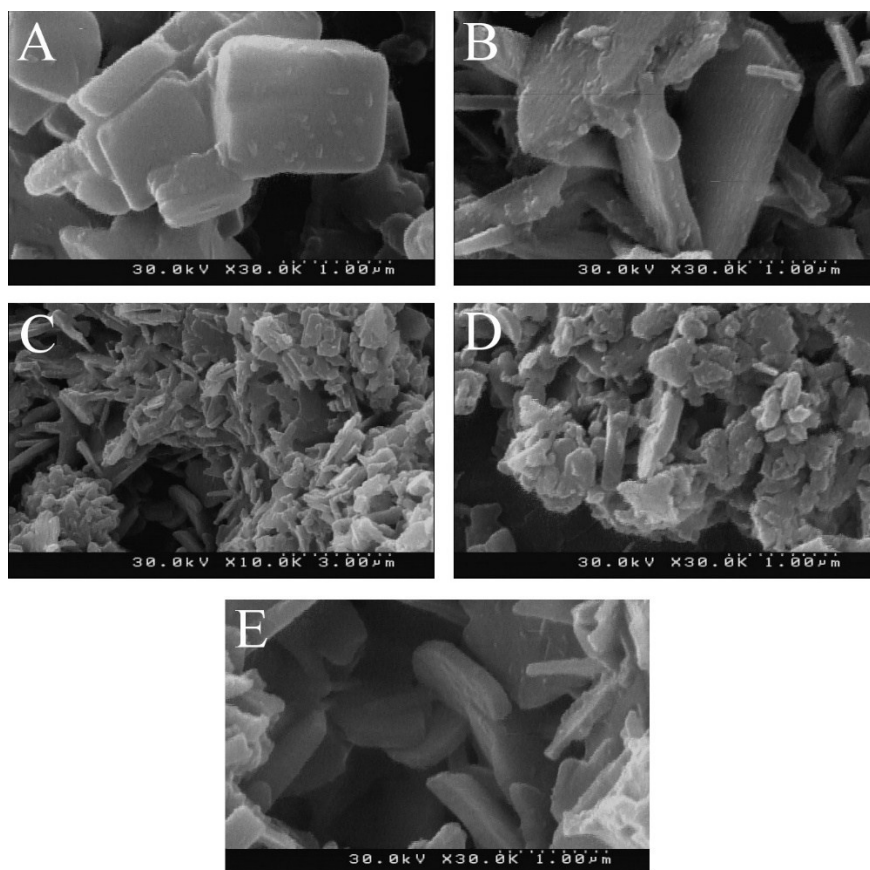

**Fig. S.2.** SEM images of (A) constant concentration of [0.05] M, 20 min for sonication time and 12 W as sonication power (B) [0.01] M, 20 min, 12 W and (C) [0.005] M, 20 min, 12 W (D) [0.01] M, 40 min, 12 W (E) [0.01] M, 20 min, 24 W

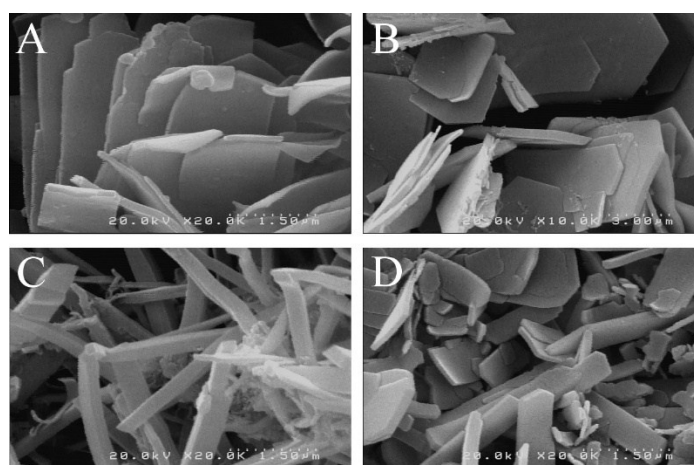

**Fig. S.3.** (A) SEM pictures of plate by  $r=2$ , (B) plate by  $r=5$ , (C) rod by  $r=2$ , (D) rod by  $r=5$ .

## Supporting Information

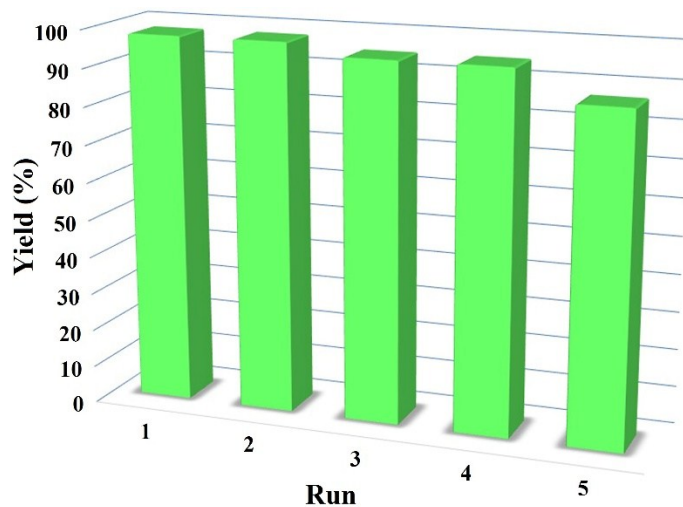

Fig. S.4. Recyclability of TMU-33 (C) in the reaction.

## Supporting Information

<sup>1</sup>H NMR, IR, Mp data and GC spectrum for some of synthesis products:

### Diethyl 4-(Phenyl)-2,6-dimethyl-1,4-dihydropyridine-3,5-dicarboxylate

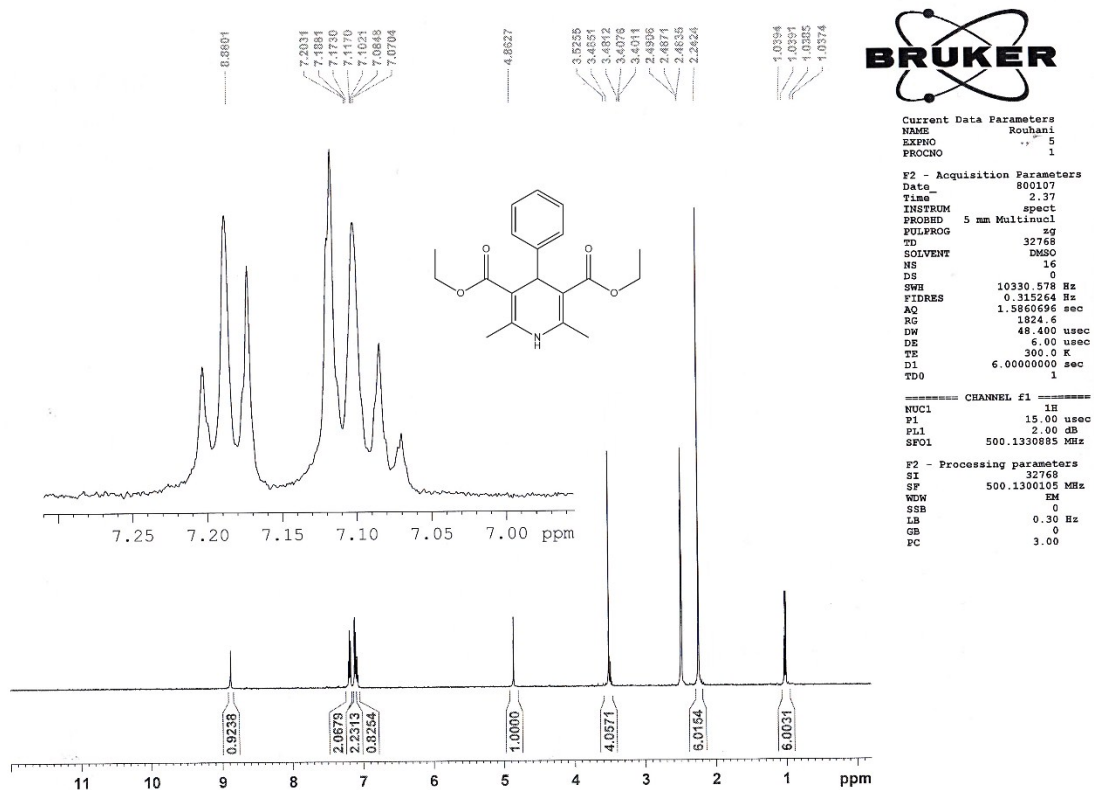

## Supporting Information

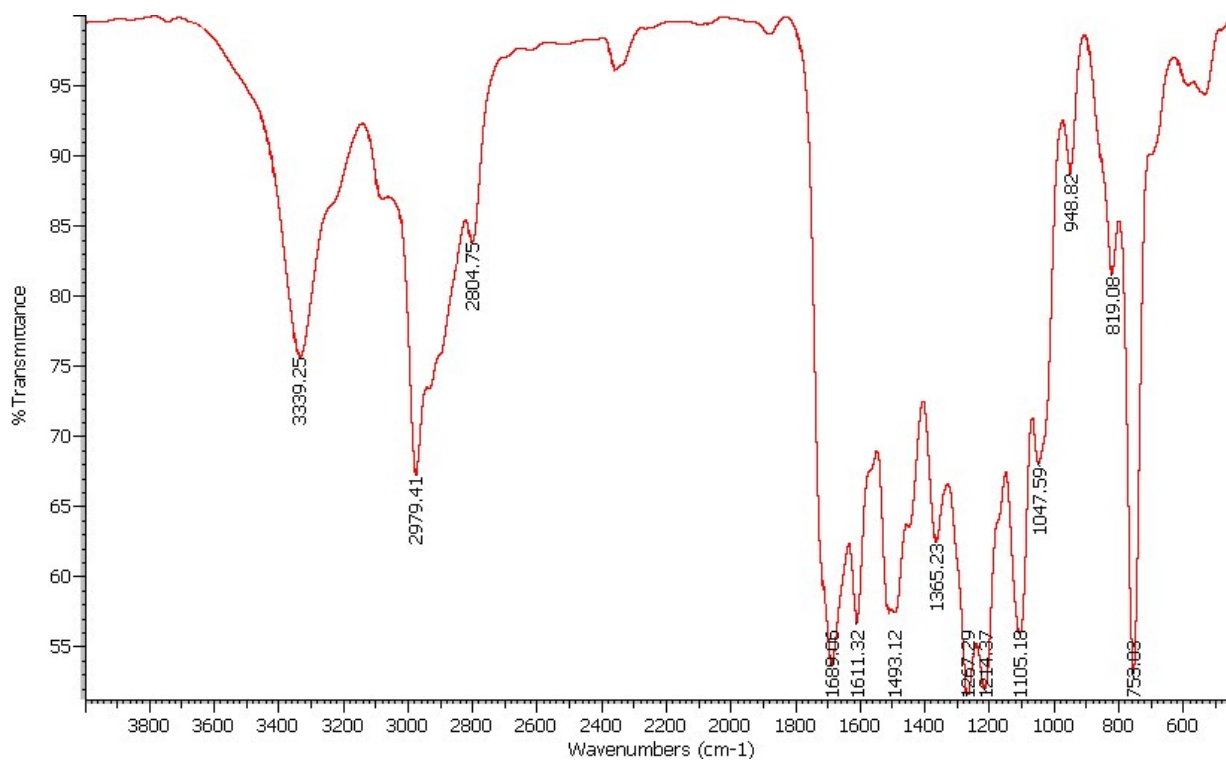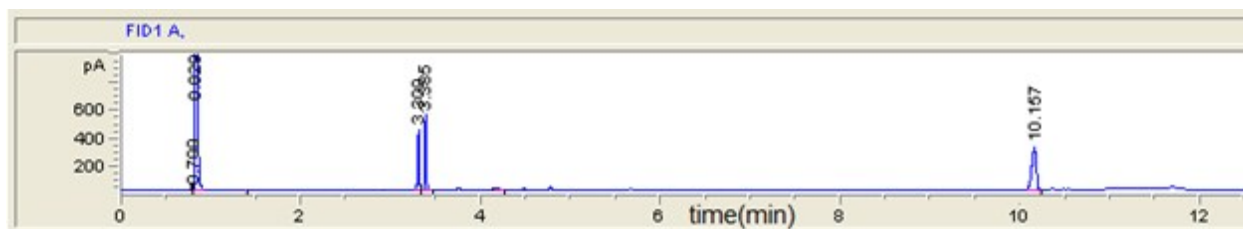

Mp 200-203 °C; <sup>1</sup>H NMR (500 MHz, DMSO): δ 8.88 (s, 1H, -NH), 7.07-7.20 (m, 5H, Ar-H), 4.86 (s, 1H, C-4H), 3.40-3.52 (q, 4H, 2x -OCH<sub>2</sub>CH<sub>3</sub>), 2.24 (s, 6H, 2x -CH<sub>3</sub>), 1.037-1.039 (t, 6H, 2x -CH<sub>2</sub>CH<sub>3</sub>), .. IR (KBr): ν<sub>max</sub> 3339, 2979, 1689, 16511, 1493, 1214, 1105, 759 cm<sup>-1</sup>.

## Supporting Information

### Diethyl 4-(4-Hydroxyphenyl)-2,6-dimethyl-1,4-dihydropyridine-3,5-dicarboxylate

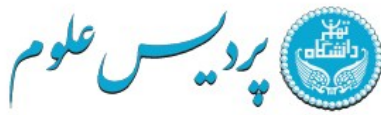

| Parameter                  | Value                     |
|----------------------------|---------------------------|
| 1 Data File Name           | F:/ Rouhani/ 3-H.fid/ fid |
| 2 Title                    | 3-H                       |
| 3 Comment                  |                           |
| 4 Origin                   | Varian                    |
| 5 Owner                    |                           |
| 6 Site                     |                           |
| 7 Instrument               | inova                     |
| 8 Author                   |                           |
| 9 Solvent                  | dmsO                      |
| 10 Temperature             | 25.0                      |
| 11 Pulse Sequence          | s2pul                     |
| 12 Experiment              | 1D                        |
| 13 Probe                   | 1D                        |
| 14 Number of Scans         | 32                        |
| 15 Receiver Gain           | 30                        |
| 16 Relaxation Delay        | 5.0000                    |
| 17 Pulse Width             | 5.0000                    |
| 18 Prestirration Frequency |                           |
| 19 Acquisition Time        | 4.0008                    |
| 20 Acquisition Date        | 2017-09-21T10:25:14       |
| 21 Modification Date       | 2017-09-21T10:33:02       |
| 22 Class                   |                           |
| 23 Spectrometer Frequency  | 499.89                    |
| 24 Spectral Width          | 7998.4                    |
| 25 Lowest Frequency        | -999.9                    |
| 26 Nucleus                 | <sup>1</sup> H            |
| 27 Acquired Size           | 32000                     |
| 28 Spectral Size           | 65536                     |

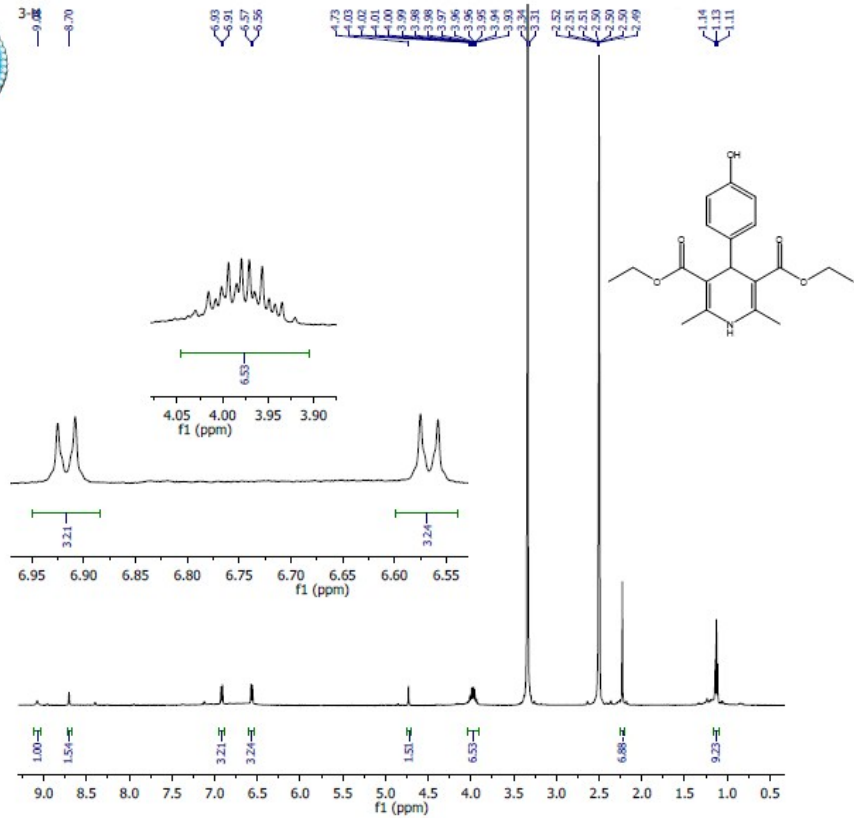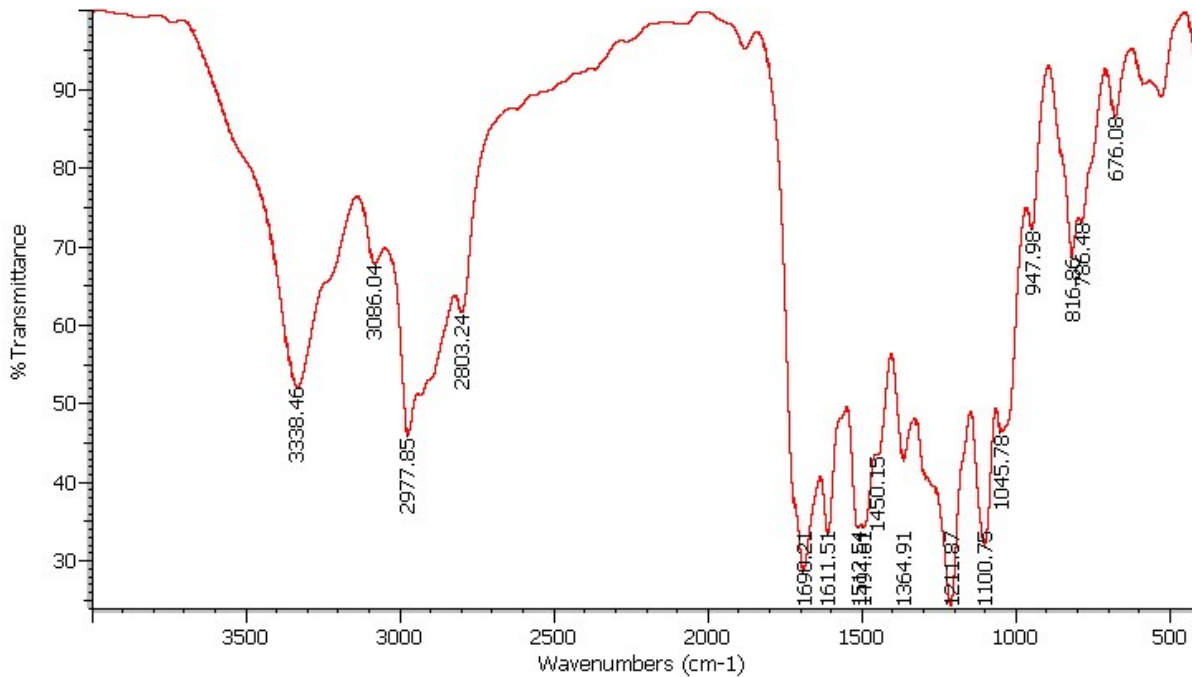



## Supporting Information

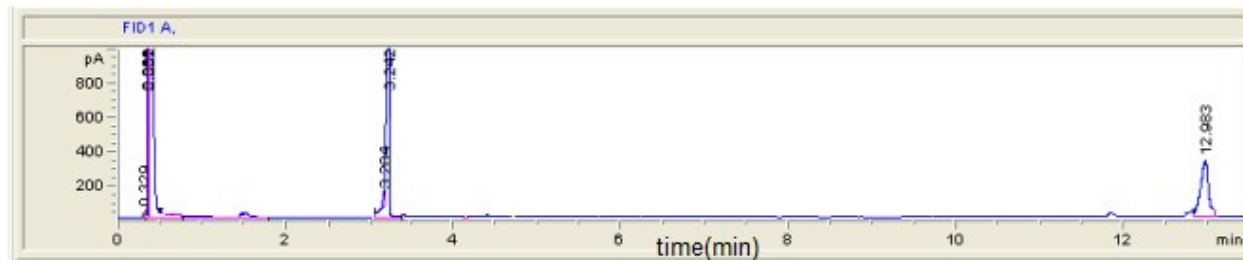

Mp 220-223 °C.  $^1\text{H}$  NMR (500 MHz, DMSO):  $\delta$  = 1.11-1.14 (t, 6 H,  $-\text{CH}_2\text{CH}_3$ ), 2.49 (s, 6 H,  $-\text{CH}_3$ ), 3.93-4.03 (q, 4 H,  $-\text{OCH}_2\text{CH}_3$ ), 4.73 (s, 1H), 6.53-6.93 (m, 4 H, Ar-H), 8.7 (s, 1 H,  $-\text{NH}$ ), 9 (s, 1 H,  $-\text{OH}$ ). FT-IR (KBr)  $\nu_{\text{max}}$ : 3338, 2977, 1690, 1611, 1512, 1211, 1100, 676  $\text{cm}^{-1}$ .

### Diethyl-4-(4-methylphenyl)-2,6-dimethyl-1,4-dihydropyridin-3,5-dicarboxylate

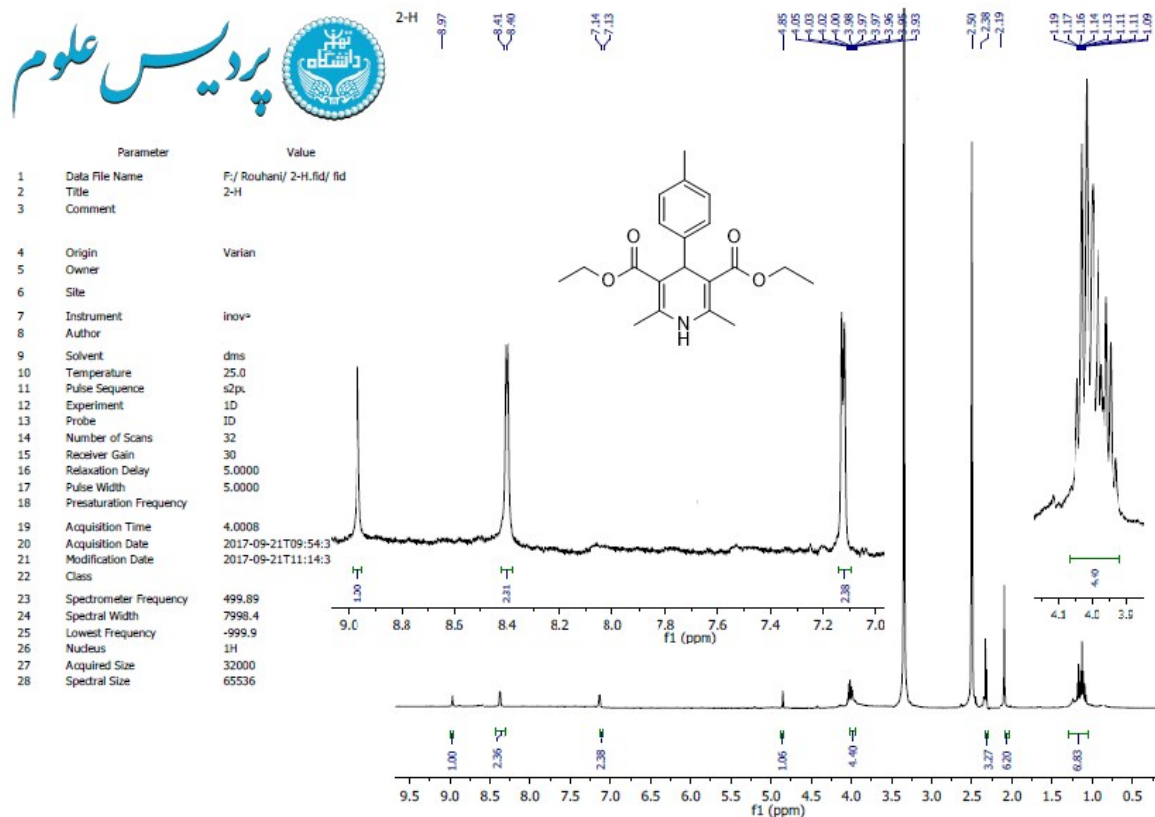

## Supporting Information

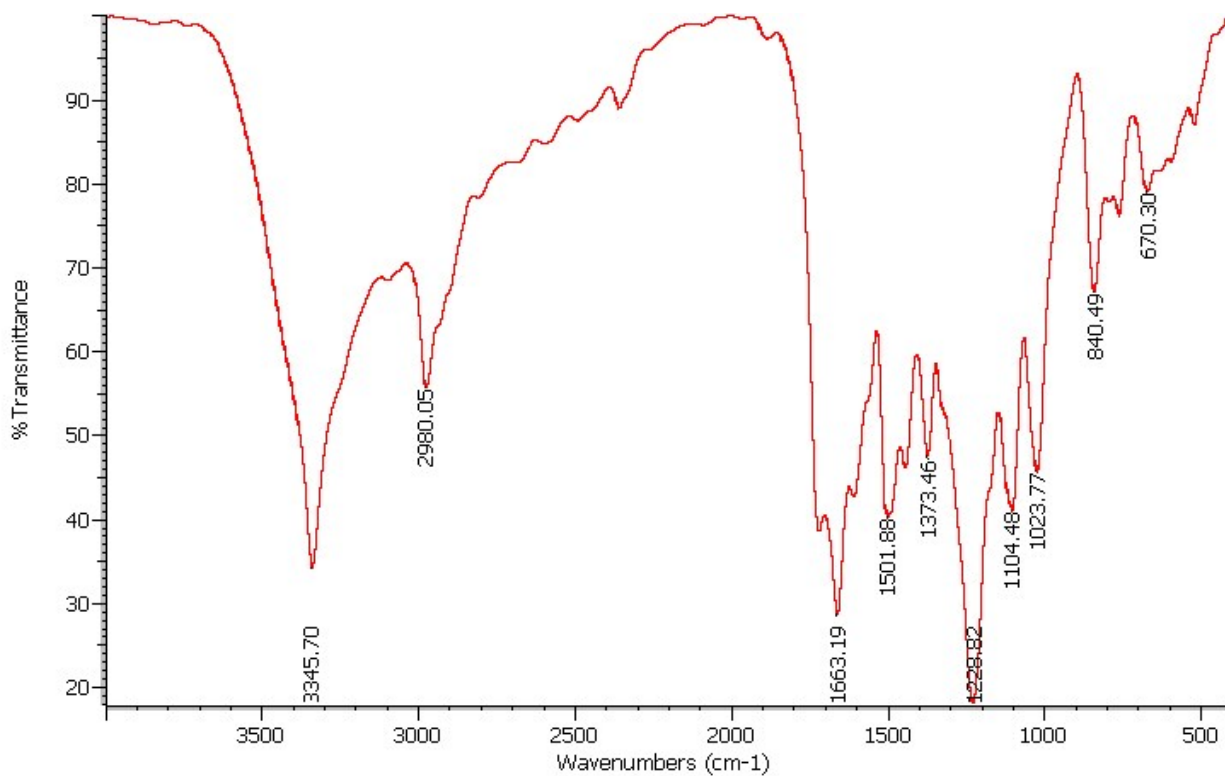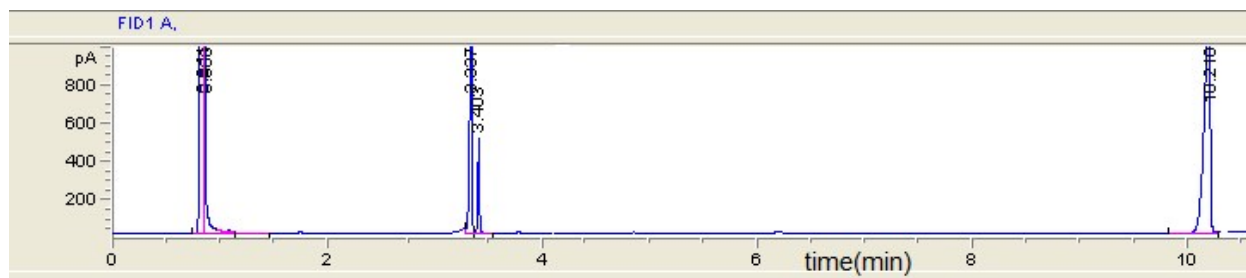

Mp 200-202 °C. <sup>1</sup>H NMR (500 MHz, DMSO): δ 1.09-1.19 (t, 6H, -CH<sub>2</sub>CH<sub>3</sub>), 2.19 (s, 3H, -CH<sub>3</sub>), 2.25 (s, 6H, -CH<sub>3</sub>), 3.78 (s, 3H, -OCH<sub>3</sub>), 3.95-4.05 (q, 4H, -OCH<sub>2</sub>CH<sub>3</sub>), 4.8 (s, 1H, C-4H), 7.13-7.14 (d, 2H, Ar-H), 8.40-8.41 (d, 2H, Ar-H), 8.97(s, 1H, NH) ppm. ; IR (KBr): ν<sub>max</sub> 3345, 2980, 1689, 1663, 1501, 1228, 1104, 720 cm<sup>-1</sup>.

## Supporting Information

### Diethyl 4-(4-Bromophenyl)-2,6-dimethyl-1,4-dihydropyridine-3,5-dicarboxylate

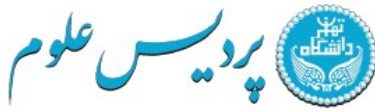

| Parameter                  | Value                     |
|----------------------------|---------------------------|
| 1 Data File Name           | F:/ Rouhani/ 7-H.fid/ fid |
| 2 Title                    | 7-H                       |
| 3 Comment                  |                           |
| 4 Origin                   | Varian                    |
| 5 Owner                    |                           |
| 6 Site                     |                           |
| 7 Instrument               | inova                     |
| 8 Author                   |                           |
| 9 Solvent                  | dmso                      |
| 10 Temperature             | 25.0                      |
| 11 Pulse Sequence          | s2pul                     |
| 12 Experiment              | 1D                        |
| 13 Probe                   | ID                        |
| 14 Number of Scans         | 32                        |
| 15 Receiver Gain           | 30                        |
| 16 Relaxation Delay        | 5.0000                    |
| 17 Pulse Width             | 5.0000                    |
| 18 Presaturation Frequency |                           |
| 19 Acquisition Time        | 4.0008                    |
| 20 Acquisition Date        | 2017-09-21T12:39:42       |
| 21 Modification Date       | 2017-09-21T13:40:04       |
| 22 Class                   |                           |
| 23 Spectrometer Frequency  | 499.89                    |
| 24 Spectral Width          | 7998.4                    |
| 25 Lowest Frequency        | -999.9                    |
| 26 Nucleus                 | <sup>1</sup> H            |
| 27 Acquired Size           | 32000                     |
| 28 Spectral Size           | 65536                     |

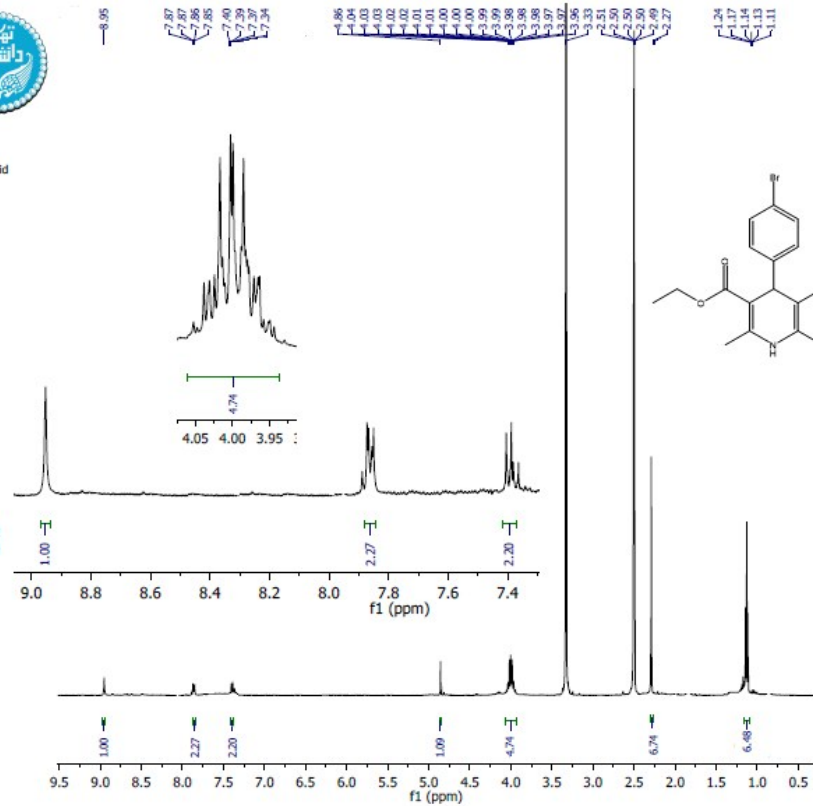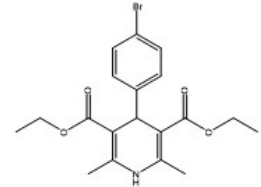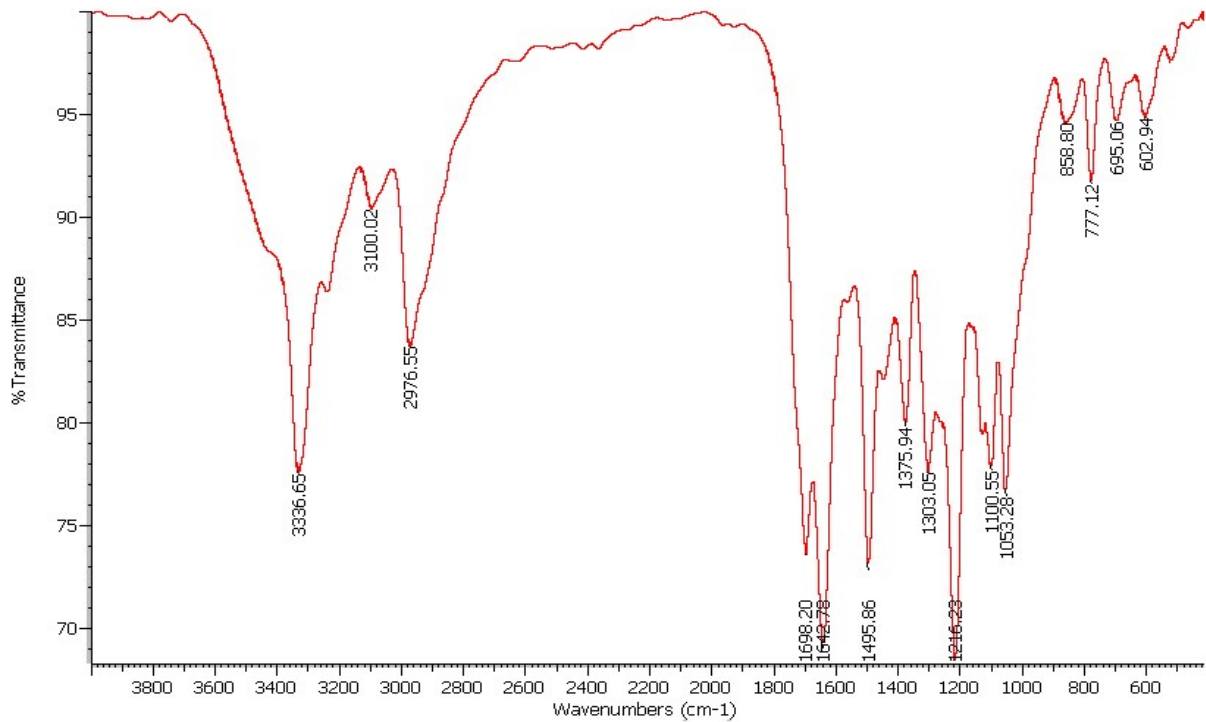

## Supporting Information

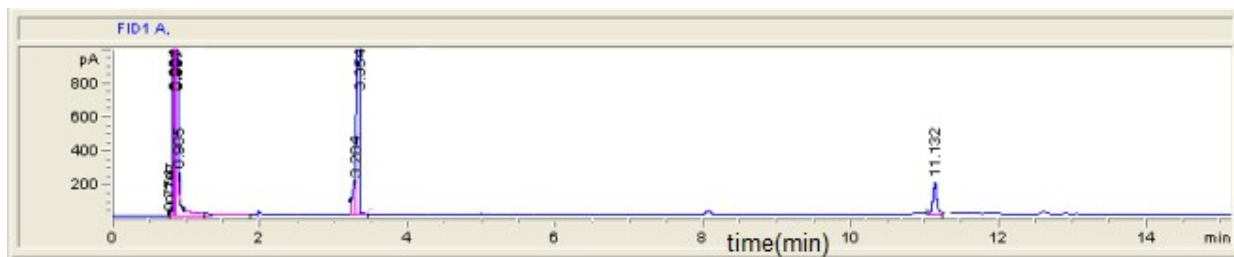

Mp 200-202 °C.  $^1\text{H}$  NMR (500 MHz, DMSO):  $\delta$  8.95 (s, 1H, NH), 7.26–7.24 (m, 2H), 7.11–7.08 (m, 2H), 5.56 (s, 1H), 4.87 (s, 1H), 4.03 (m, 4H), 2.29 (s, 6H), 1.15 (t,  $J = 7.1$  Hz, 6H) ppm; IR (KBr):  $\nu_{\text{max}}$  3336, 3100, 2976, 1698, 1642, 1495, 1216, 1100, 777  $\text{cm}^{-1}$ .

### Diethyl 4-(4-Chlorophenyl)-2,6-dimethyl-1,4-dihydropyridine-3,5-dicarboxylate

Mp 209-211 °C.; IR (KBr):  $\nu_{\text{max}}$  3356, 3085, 2979, 1693, 1650, 1376, 1213, 1100, 781  $\text{cm}^{-1}$ .

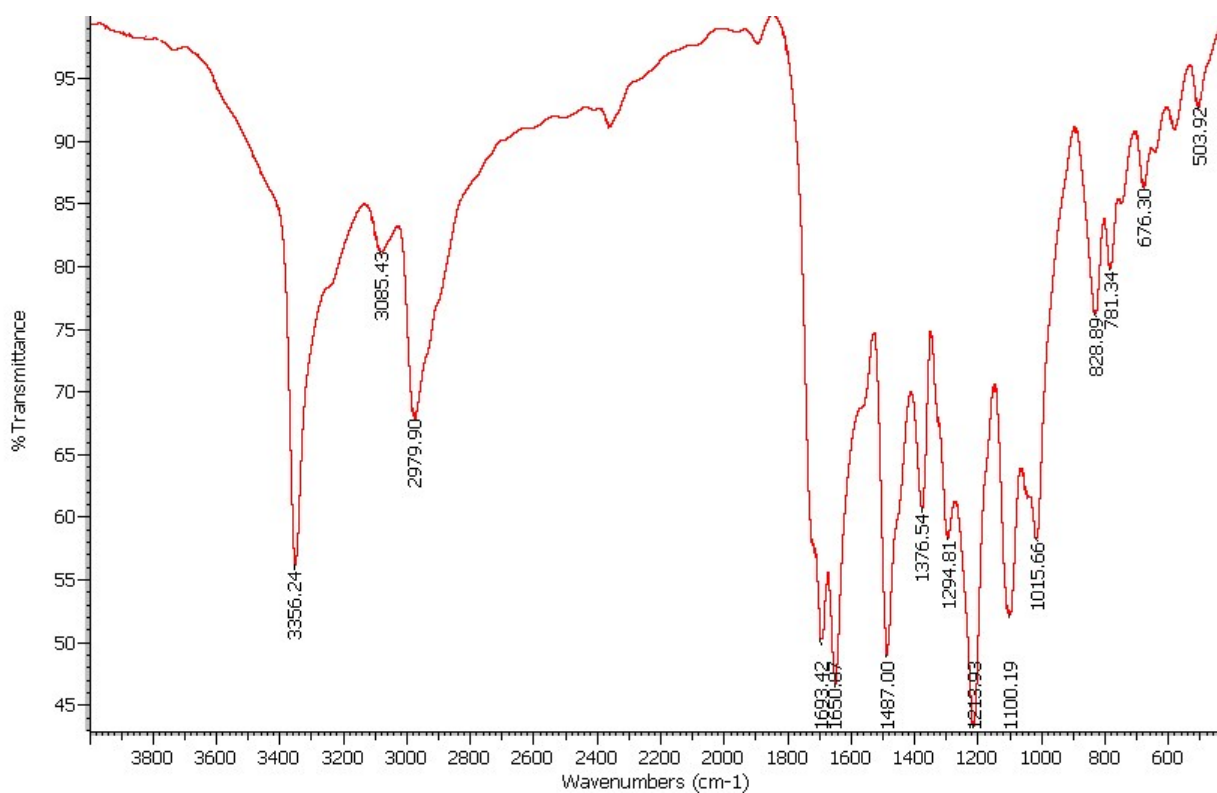

## Supporting Information

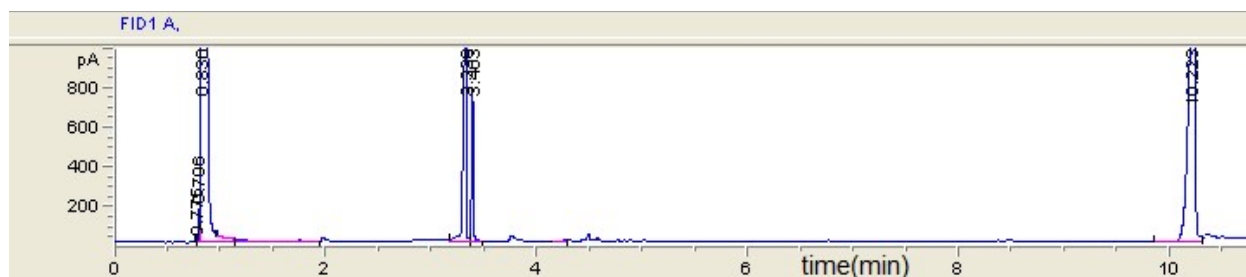

### Diethyl 4-(4-Nitrophenyl)-2,6-dimethyl-1,4-dihydropyridine-3,5-dicarboxylate

Mp 208-211 °C; IR (KBr):  $\nu_{\max}$  3310, 3099, 2978, 1696, 1652, 1492, 1212, 1104, 745  $\text{cm}^{-1}$ .

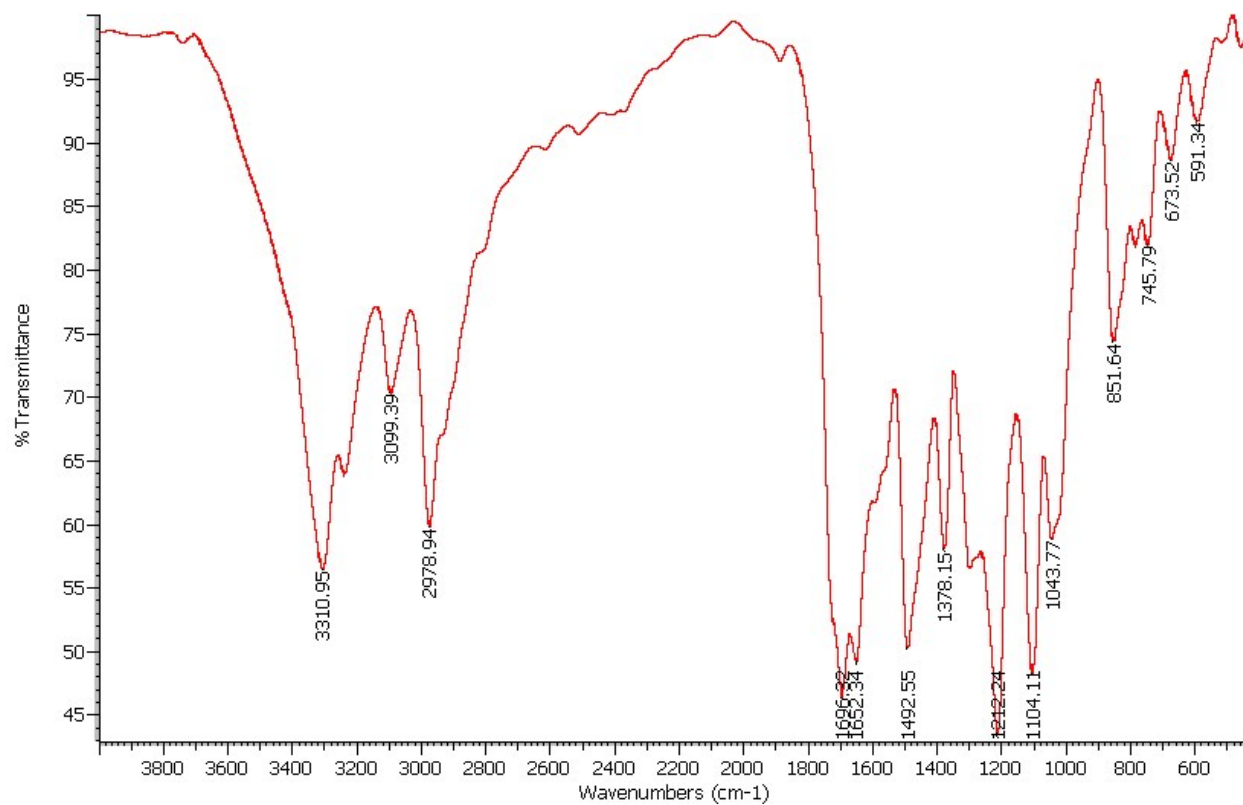

## Supporting Information

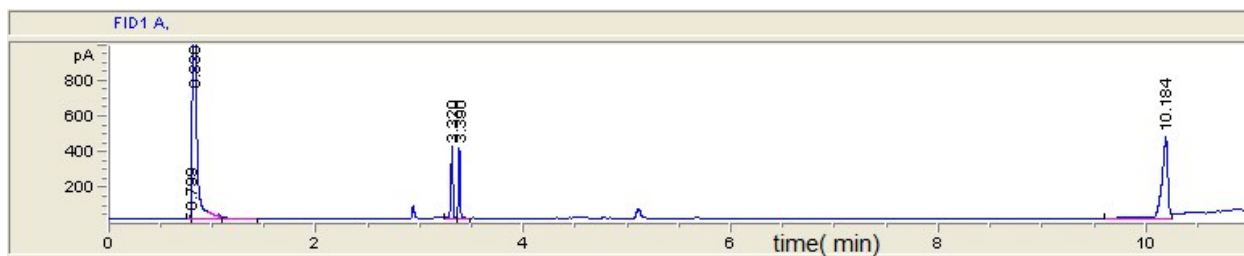

### Diethyl 4-(4-Methoxyphenyl)-2,6-dimethyl-1,4-dihydropyridine-3,5-dicarboxylate

Mp 200-202 °C; IR (KBr):  $\nu_{\max}$  3336, 3083, 2978, 1691, 1630, 1488, 1212, 1100, 777  $\text{cm}^{-1}$ .

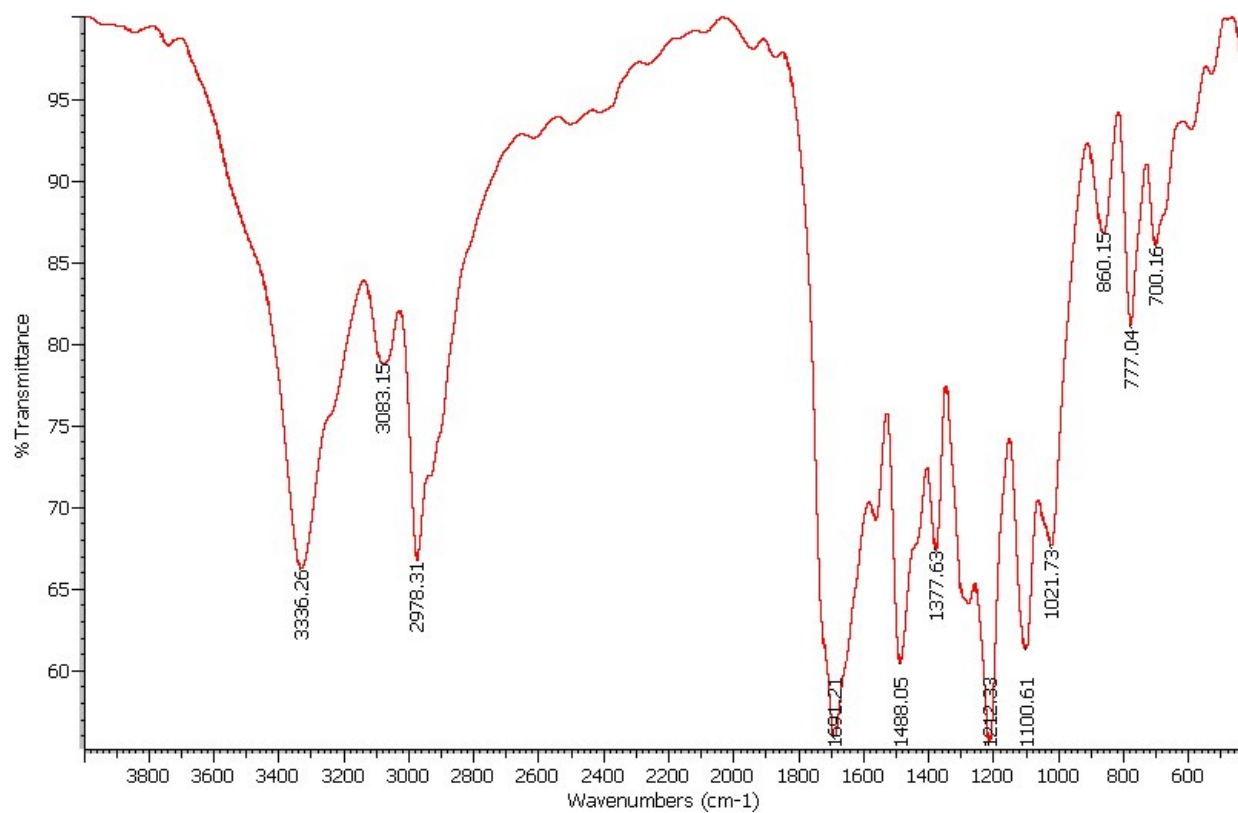

## Supporting Information

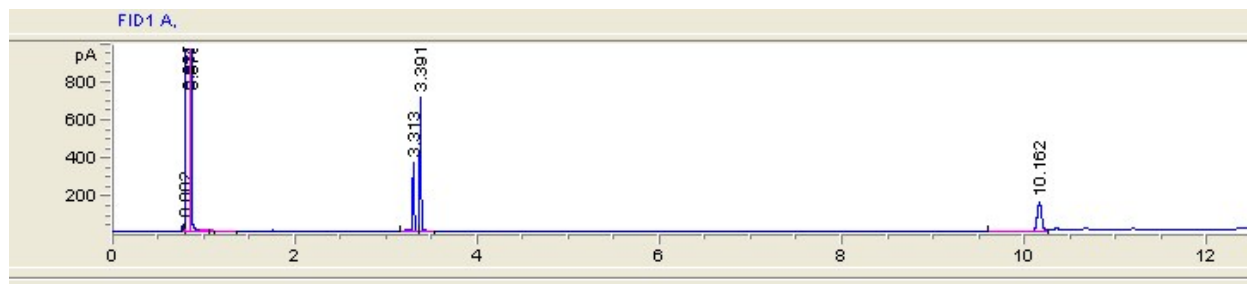

Supplement: c7nj01509g1.pdf [file c7nj01509g1.pdf]
